# Supplementary material for: MiR-126 Is an Independent Predictor of Long-Term All-Cause Mortality in Patients with Type 2 Diabetes Mellitus
Source: MDPI journal article supplement (doi:10.3390/jcm10112371), 2021-05-28
Supplement: s1 [file s1]

**Supplemental Table S3. Multivariate Cox regression model for prediction of long-term all-cause of mortality for miR-126, Let-7e, miR-223 and miR-125a-3p**

| Variable           |                       | HR     | 95%CI |        | p-value       |
|--------------------|-----------------------|--------|-------|--------|---------------|
|                    |                       |        | Lower | Upper  |               |
| <i>miR-126</i>     | High miR-126          | 6.749  | 2.396 | 19.011 | <b>0.0003</b> |
|                    | Age                   | 1.066  | 1.016 | 1.118  | <b>0.009</b>  |
|                    | Gender (male)         | 3.290  | 1.034 | 10.465 | <b>0.044</b>  |
|                    | history of smoking    | 1.858  | 0.616 | 5.607  | 0.271         |
|                    | prior ischemic stroke | 4.031  | 1.288 | 12.620 | <b>0.017</b>  |
|                    | GFR<30                | 9.135  | 1.421 | 58.738 | <b>0.020</b>  |
| <i>let-7e</i>      | High let-7e           | 5.231  | 1.866 | 14.659 | <b>0.002</b>  |
|                    | Age                   | 1.062  | 1.011 | 1.115  | <b>0.016</b>  |
|                    | Gender (male)         | 3.981  | 1.258 | 12.604 | <b>0.019</b>  |
|                    | history of smoking    | 1.517  | 0.548 | 4.201  | 0.423         |
|                    | prior ischemic stroke | 2.256  | 0.932 | 7.009  | 0.068         |
|                    | GFR<30                | 8.038  | 1.431 | 45.149 | <b>0.018</b>  |
| <i>miR-223</i>     | High miR-223          | 2.850  | 1.080 | 7.525  | <b>0.034</b>  |
|                    | Age                   | 1.063  | 1.012 | 1.116  | <b>0.014</b>  |
|                    | Gender (male)         | 3.729  | 1.194 | 11.646 | <b>0.023</b>  |
|                    | history of smoking    | 1.646  | 0.611 | 4.430  | 0.324         |
|                    | prior ischemic stroke | 2.345  | 0.846 | 6.498  | 0.101         |
|                    | GFR<30                | 11.602 | 2.082 | 64.656 | <b>0.005</b>  |
| <i>miR-125a-3p</i> | High miR-125a-3p      | 2.784  | 1.181 | 6.560  | <b>0.019</b>  |

|  |                              |       |       |        |              |
|--|------------------------------|-------|-------|--------|--------------|
|  | <b>Age</b>                   | 1.059 | 1.010 | 1.111  | <b>0.019</b> |
|  | <b>Gender (male)</b>         | 3.611 | 1.149 | 11.351 | <b>0.028</b> |
|  | <b>history of smoking</b>    | 1.781 | 0.666 | 4.759  | 0.250        |
|  | <b>prior ischemic stroke</b> | 2.126 | 0.774 | 5.841  | 0.144        |
|  | <b>GFR&lt;30</b>             | 8.648 | 1.518 | 49.277 | <b>0.015</b> |

HR, hazard ratio; MI, myocardial infarction, 95%CI, 95% confidence interval;
