# Supplementary material for: MiR-126 Is an Independent Predictor of Long-Term All-Cause Mortality in Patients with Type 2 Diabetes Mellitus
Source: MDPI journal article supplement (doi:10.3390/jcm10112371), 2021-05-28
Supplement: s1 [file s1]

**Supplemental Table S1. Patient's characteristics according to miR-126, Let-7e, miR-223 and miR-125a-3p expression subgroup. Comparison of the study groups.**

| Patient demographics     | Low miR-126<br>N= 150<br>(59.5%) | High miR-126<br>N= 102<br>(40.5%) | p-value | Low Let-7e<br>N= 132<br>(52%) | High Let-7e<br>N= 120<br>(48%) | p-value | Low miR-223<br>N= 150<br>(59.5%) | High miR-223<br>N= 102<br>(40.5%) | p-value | Low miR-125a-3p<br>N= 132<br>(52%) | High miR-125a-3p<br>N= 120<br>(48%) | p-value |
|--------------------------|----------------------------------|-----------------------------------|---------|-------------------------------|--------------------------------|---------|----------------------------------|-----------------------------------|---------|------------------------------------|-------------------------------------|---------|
| miRNA                    | 0.403 ± 0.506                    | 321.362 ± 1888.45                 | <0.000  | 0.187 ± 0.202                 | 91.04 ± 495.97                 | <0.000  | 2.15 ± 1.69                      | 1680.95 ± 11411.81                | <0.000  | 0.06 ± 0.29                        | 0.81 ± 3.66                         | <0.000  |
| Age (years)<br>mean ± SD | 67.23 ± 8.36                     | 66.81 ± 8.82                      | 0.702   | 67.18 ± 8.78                  | 66.92 ± 8.28                   | 0.811   | 68.10 ± 8.47                     | 66.22 ± 8.50                      | 0.082   | 66.77 ± 8.26                       | 67.17 ± 8.90                        | 0.651   |
| Sex (female) n (%)       | 65 (56%)                         | 51 (44%)                          | 0.320   | 56 (48%)                      | 61 (52%)                       | 0.200   | 48 (41%)                         | 69 (59%)                          | 0.071   | 63 (56%)                           | 50 (44%)                            | 0.427   |
| Body mass index (BMI)    | 32.18 ± 15.94                    | 30.41 ± 5.16                      | 0.281   | 32.19 ± 16.93                 | 30.67 ± 5.13                   | 0.347   | 32.44 ± 17.98                    | 30.64 ± 5.11                      | 0.709   | 32.18 ± 16.02                      | 30.55 ± 5.48                        | 0.173   |
| Hypertension             | 135 (60%)                        | 92 (41%)                          | 0.560   | 118 (52%)                     | 109 (48%)                      | 0.699   | 104 (46%)                        | 124 (54%)                         | 0.883   | 133 (59%)                          | 91 (41%)                            | 0.308   |
| Dyslipidaemia            | 126 (60%)                        | 86 (41%)                          | 0.760   | 109 (52 %)                    | 103 (49%)                      | 0.767   | 95 (45%)                         | 118 (55%)                         | 0.648   | 125 (60%)                          | 85 (41%)                            | 0.448   |
| HF                       | 55 (61%)                         | 35 (39%)                          | 0.657   | 48 (52%)                      | 43 (47%)                       | 0.861   | 42 (46%)                         | 49 (54%)                          | 0.853   | 53 (60%)                           | 36 (40%)                            | 0.852   |
| Current smoking          | 17 (68%)                         | 8 (32%)                           | 0.393   | 16 (64%)                      | 9 (36%)                        | 0.215   | 14 (56%)                         | 11 (44%)                          | 0.305   | 18 (72%)                           | 7 (28%)                             | 0.196   |
| CAD                      | 79 (59%)                         | 56 (42%)                          | 0.836   | 71 (53%)                      | 64 (47%)                       | 0.790   | 61 (45%)                         | 75 (55%)                          | 0.914   | 75 (56%)                           | 59 (44%)                            | 0.436   |

|                             |          |           |       |          |          |       |          |          |       |          |          |       |
|-----------------------------|----------|-----------|-------|----------|----------|-------|----------|----------|-------|----------|----------|-------|
|                             |          |           |       |          |          |       |          |          |       |          |          |       |
| Prior myocardial infarction | 49 (65%) | 26 (35%)  | 0.208 | 43 (58%) | 31 (42%) | 0.196 | 34 (45%) | 41 (55%) | 0.978 | 42 (57%) | 32 (43%) | 0.710 |
| History of smoking          | 82 (57%) | 61 (43%)  | 0.528 | 74 (52%) | 68 (48%) | 0.912 | 62 (43%) | 81 (57%) | 0.498 | 83 (58%) | 61 (42%) | 0.734 |
| ACS                         | 5 (83%)  | 1 (17%)   | 0.268 | 3 (50%)  | 3 (50%)  | 0.755 | 2 (33%)  | 4 (67%)  | 0.314 | 4 (67%)  | 2 (33%)  | 0.572 |
| Stroke                      | 2 (33%)  | 4 (66.7%) | 0.147 | 2 (33%)  | 4 (67%)  | 0.251 | 3 (50%)  | 3 (50%)  | 0.630 | 2 (33%)  | 4 (67%)  | 0.158 |

| Laboratory data (mean±SD)                    | Low miR-126<br>N= 150<br>(59.5%) | High miR-126<br>N= 102<br>(40.5%) | p-value | Low Let-7e<br>N= 132<br>(52%) | High Let-7e<br>N= 120<br>(48%) | p-value | Low miR-223<br>N= 150<br>(59.5%) | High miR-223<br>N= 102<br>(40.5%) | p-value | Low miR-125a-3p<br>N= 132<br>(52%) | High miR-125a-3p<br>N= 120<br>(48%) | p-value |
|----------------------------------------------|----------------------------------|-----------------------------------|---------|-------------------------------|--------------------------------|---------|----------------------------------|-----------------------------------|---------|------------------------------------|-------------------------------------|---------|
| White blood cell count (x10 <sup>9</sup> /L) | 6.94 ± 1.84                      | 6.87 ± 1.97                       | 0.786   | 6.90 ± 1.90                   | 6.89 ± 1.93                    | 0.952   | 6.91 ±1.91                       | 6.88 ±1.90                        | 0.802   | 6.76 ±1.84                         | 7.09 ±1.97                          | 0.297   |
| Platelets (x10 <sup>9</sup> /L)              | 220.03 ± 62.07                   | 228.13 ± 60.58                    | 0.336   | 215.69 ± 59.32                | 230.69 ± 64.4                  | 0.145   | 214.76 ±59.90                    | 229.40 ±63.05                     | 0.188   | 218.28 ±63.46                      | 227.73 ±55.98                       | 0.187   |

|                                                           |                   |                   |       |                   |                   |              |                  |                   |       |                  |                   |              |
|-----------------------------------------------------------|-------------------|-------------------|-------|-------------------|-------------------|--------------|------------------|-------------------|-------|------------------|-------------------|--------------|
|                                                           |                   |                   |       |                   |                   |              |                  |                   |       |                  |                   |              |
| Haemoglobin<br>(g/dL)                                     | 13.90 ± 1.2       | 13.48 ± 1.77      | 0.056 | 13.90 ± 1.31      | 13.52 ± 1.62      | 0.051        | 13.84 ±1.29      | 13.63 ±1.60       | 0.327 | 13.91 ±1.25      | 13.52 ±1.77       | 0.091        |
| High-<br>sensitivity C-<br>reactive<br>Protein<br>(mg/dL) | 2.9 ± 2.6         | 4.19 ± 5          | 0.080 | 2.68 ± 2.42       | 4.18 ± 4.87       | <b>0.039</b> | 2.85 ±2.36       | 3.82 ±4.60        | 0.347 | 2.97 ±3.05       | 3.97 ±4.59        | 0.056        |
| Fibrinogen<br>(mg/dL)                                     | 139.16 ±<br>46.97 | 143.4 ± 44.31     | 0.499 | 139.09 ±<br>46.61 | 142.32 ±<br>45.45 | 0.599        | 391.49<br>±92.90 | 412.06<br>±112.19 | 0.420 | 387.87<br>±95.59 | 426.83<br>±110.72 | <b>0.017</b> |
| Creatinine<br>(mg/dL)                                     | 1 ± 0.3           | 1.02 ± 0.34       | 0.608 | 0.98 ± 0.27       | 1.04 ± 0.36       | 0.158        | 1.00 ±0.29       | 1.01 ±0.34        | 0.817 | 0.97 ±0.26       | 1.07 ±0.38        | 0.095        |
| HbA1c                                                     | 6.96 ± 1.26       | 7.07 ± 1.4        | 0.535 | 6.96 ± 1.29       | 7.06 ± 1.35       | 0.570        | 6.88 ±1.31       | 7.11 ±1.31        | 0.052 | 6.88 ±1.24       | 7.16 ±1.42        | 0.089        |
| Tch                                                       | 156.79 ±<br>36.79 | 161.90 ±<br>36.03 | 0.304 | 153.9 ± 35.74     | 163.57 ±<br>36.80 | <b>0.045</b> | 156.05<br>±36.04 | 160.74<br>±36.99  | 0.186 | 153.33<br>±36.33 | 166.60<br>±36.43  | <b>0.003</b> |

|     |                   |                   |       |                   |               |              |                  |                  |       |                  |                  |       |
|-----|-------------------|-------------------|-------|-------------------|---------------|--------------|------------------|------------------|-------|------------------|------------------|-------|
|     |                   |                   |       |                   |               |              |                  |                  |       |                  |                  |       |
| TG  | 127.30 ±<br>57.71 | 141.35 ±<br>68.97 | 0.098 | 122.94 ±<br>56.46 | 143 ± 67.63   | <b>0.011</b> | 125.51<br>±58.20 | 138.43<br>±65.67 | 0.091 | 125.80<br>±56.99 | 144.30<br>±69.29 | 0.055 |
| HDL | 47.86 ± 13.16     | 53.56 ± 45.98     | 0.167 | 47.82 ± 13.24     | 52.64 ± 42.41 | 0.232        | 47.85 ±13.66     | 51.89 ±39.39     | 0.607 | 50.31 ±37.88     | 49.12 ±12.47     | 0.279 |
| LDL | 83.76 ± 31.29     | 84.27 ± 26.05     | 0.900 | 82.12 ± 30.37     | 85.51 ± 27.92 | 0.392        | 83.92 ±30.08     | 83.76 ±28.79     | 0.973 | 81.94 ±29.51     | 86.99 ±30.05     | 0.157 |

| Concomitant medications<br>n (%) | Low miR-126<br>N= 150 (59.5%) | High miR-126<br>N= 102 (40.5%) | p-value | Low Let-7e<br>N= 132 (52%) | High Let-7e<br>N= 120 (48%) | p-value      | Low miR-223<br>N= 150 (59.5%) | High miR-223<br>N= 102 (40.5%) | p-value | Low miR-125a-3p<br>N= 132 (52%) | High miR-125a-3p<br>N= 120 (48%) | p-value      |
|----------------------------------|-------------------------------|--------------------------------|---------|----------------------------|-----------------------------|--------------|-------------------------------|--------------------------------|---------|---------------------------------|----------------------------------|--------------|
| ASA 75mg                         | 103 (62%)                     | 63 (38%)                       | 0.175   | 93 (56%)                   | 73 (44%)                    | 0.090        | 81 (49%)                      | 86 (52%)                       | 0.168   | 103 (62%)                       | 63 (38%)                         | <b>0.038</b> |
| ASA 150mg                        | 21 (66%)                      | 11 (34%)                       | 0.440   | 18 (56%)                   | 14 (44%)                    | 0.623        | 14 (44%)                      | 18 (56%)                       | 0.819   | 20 (63%)                        | 12 (38%)                         | 0.620        |
| Clopidogrel                      | 25 (57%)                      | 28 (53%)                       | 0.580   | 20 (38%)                   | 33 (62%)                    | <b>0.027</b> | 20 (38%)                      | 33 (62%)                       | 0.152   | 22 (44%)                        | 28 (56%)                         | <b>0.030</b> |
| β-blockers                       | 103 (58%)                     | 74 (42%)                       | 0.732   | 90 (51%)                   | 87 (49%)                    | 0.561        | 76 (43%)                      | 102 (57%)                      | 0.178   | 103 (58%)                       | 74 (42%)                         | 0.765        |
| ACE inhibitors                   | 102 (62%)                     | 62 (38%)                       | 0.137   | 90 (51%)                   | 87 (49%)                    | 0.207        | 77 (47%)                      | 88 (53%)                       | 0.568   | 103 (64%)                       | 59 (36%)                         | <b>0.033</b> |
| Statins                          | 102 (57%)                     | 76 (43%)                       | 0.424   | 90 (51%)                   | 88 (49%)                    | 0.465        | 80 (45%)                      | 99 (55%)                       | 0.727   | 106 (60%)                       | 72 (40%)                         | 0.688        |
| Oral antidiabetic drugs          | 125 (59%)                     | 86 (41%)                       | 0.876   | 112 (53%)                  | 99 (47%)                    | 0.343        | 97 (46%)                      | 115 (54%)                      | 0.677   | 127 (61%)                       | 81 (39%)                         | 0.060        |
| Calcium channel-blockers         | 55 (59%)                      | 39 (42%)                       | 0.928   | 47 (51%)                   | 46 (50%)                    | 0.718        | 41 (44%)                      | 53 (56%)                       | 0.663   | 58 (63%)                        | 34 (37%)                         | 0.348        |
| Proton pump Inhibitors           | 26 (47%)                      | 23 (53%)                       | 0.153   | 22 (45%)                   | 27 (55%)                    | 0.066        | 21 (43%)                      | 28 (57 %)                      | 0.363   | 25 (50%)                        | 25 (50%)                         | 0.058        |

Data are reported as mean ± standard deviation (SD). Abbreviations: ACE, angiotensin converting enzyme; ACS, acute coronary syndrome; ASA, acetylsalicylic acid; BMI, body mass index; CAD, coronary artery disease; HDL, high-density lipoprotein; HF, heart failure; LDL, low-density lipoprotein; MI, myocardial infarction; miRNA, microRNA; TG, triglycerides
