# Supplementary material for: MiR-126 Is an Independent Predictor of Long-Term All-Cause Mortality in Patients with Type 2 Diabetes Mellitus
Source: MDPI journal article supplement (doi:10.3390/jcm10112371), 2021-05-28
Supplement: s1 [file s1]

**Supplemental Table S2. miRNAs expression interaction with antiplatelet therapy.**

| <b>miRNA</b>       | <b>ASA 75 mg</b>       | <b>ASA 150 mg</b>    | <b>Clopidogrel</b>   | <b>p value</b> |
|--------------------|------------------------|----------------------|----------------------|----------------|
| <b>miR-126</b>     | 0.53 [0-14972.2]       | 0.54 [0.011-279.17]  | 2.54 [0.017-2846.55] | <b>0.047</b>   |
| <b>Let-7e</b>      | 0.53 [0.001-4754.24]   | 0.060 [0.007-119.84] | 1.38 [0.005-2069.41] | <b>0.046</b>   |
| <b>miR-223</b>     | 7.16 [0.006-106095.21] | 9.18 [0.16-1657.74]  | 23.02 [0.31-1998.91] | 0.079          |
| <b>miR-125a-3p</b> | 0.008 [0.0-24.67]      | 0.08 [0.0-26.02]     | 0.023 [0.0-1.206]    | 0.134          |

Data are expressed as median and range and compared using Kruskal-Wallis test.
